# Supplementary material for: Tracing the metabolism of HT-2 toxin and T-2 toxin in barley by isotope-assisted untargeted screening and quantitative LC-HRMS analysis
Source: PubMed Central journal article supplement (PMC4595538; doi:10.1007/s00216-015-8975-9), 2015-09-03
Supplement: 216_2015_8975_MOESM1_ESM.pdf [file 216_2015_8975_MOESM1_ESM.pdf]

## **Analytical and Bioanalytical Chemistry**

### **Electronic Supplementary Material**

#### **Tracing the metabolism of HT-2 toxin and T-2 toxin in barley by isotope assisted untargeted screening and quantitative LC-HRMS analysis**

Jacqueline Meng-Reiterer, Elisabeth Varga, Alexis V. Nathanail, Christoph Bueschl, Justyna Rechthaler, Susan P. McCormick, Herbert Michlmayr, Alexandra Malachová, Philipp Fruhmann, Gerhard Adam, Franz Berthiller, Marc Lemmens, Rainer Schuhmacher

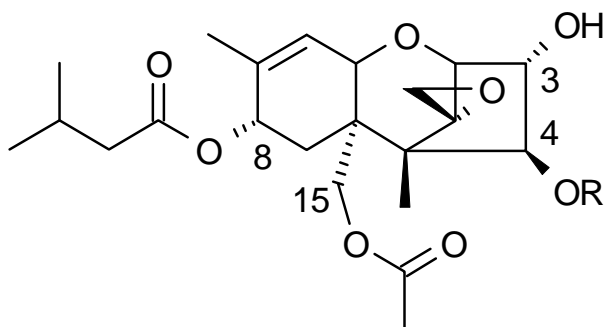

**Fig. S1** Structural formula of HT-2 toxin (R = H) and T-2 toxin (R = acetyl). Most relevant positions for this plant metabolism study are highlighted.

### 1. Qualitative screening (untargeted approach)

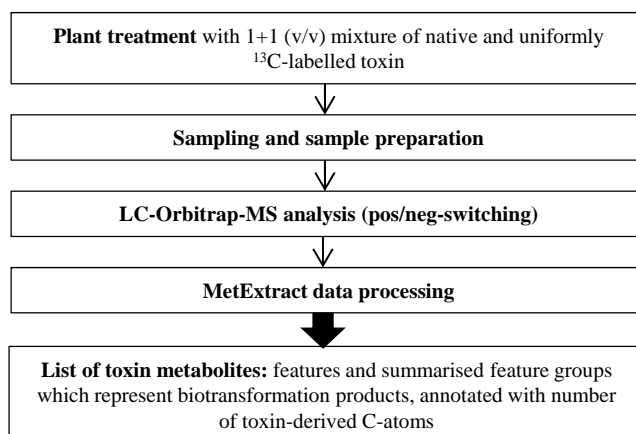

### 2. Structure annotation of toxin metabolites

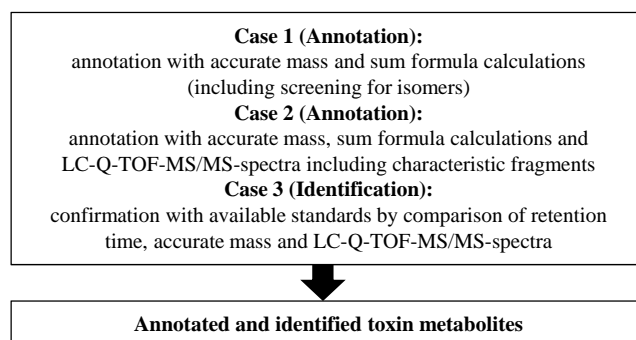

### 3. Time course experiment (targeted approach)

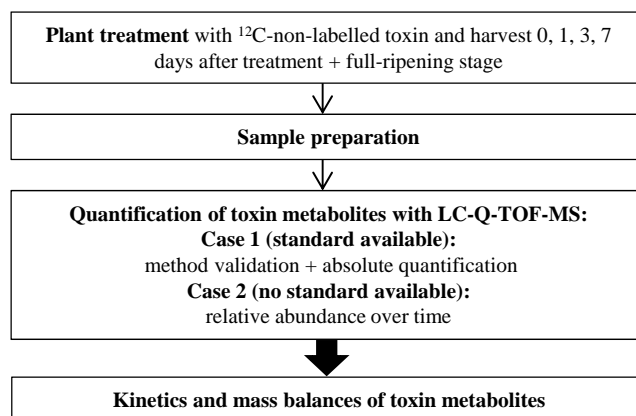

**Fig. S2** Workflow for the study of the metabolism of HT-2 toxin and T-2 toxin in barley. Liquid chromatography coupled to high resolution mass spectrometry (LC-HRMS(/MS)) was used for qualitative screening, structure annotation and (relative) quantification.

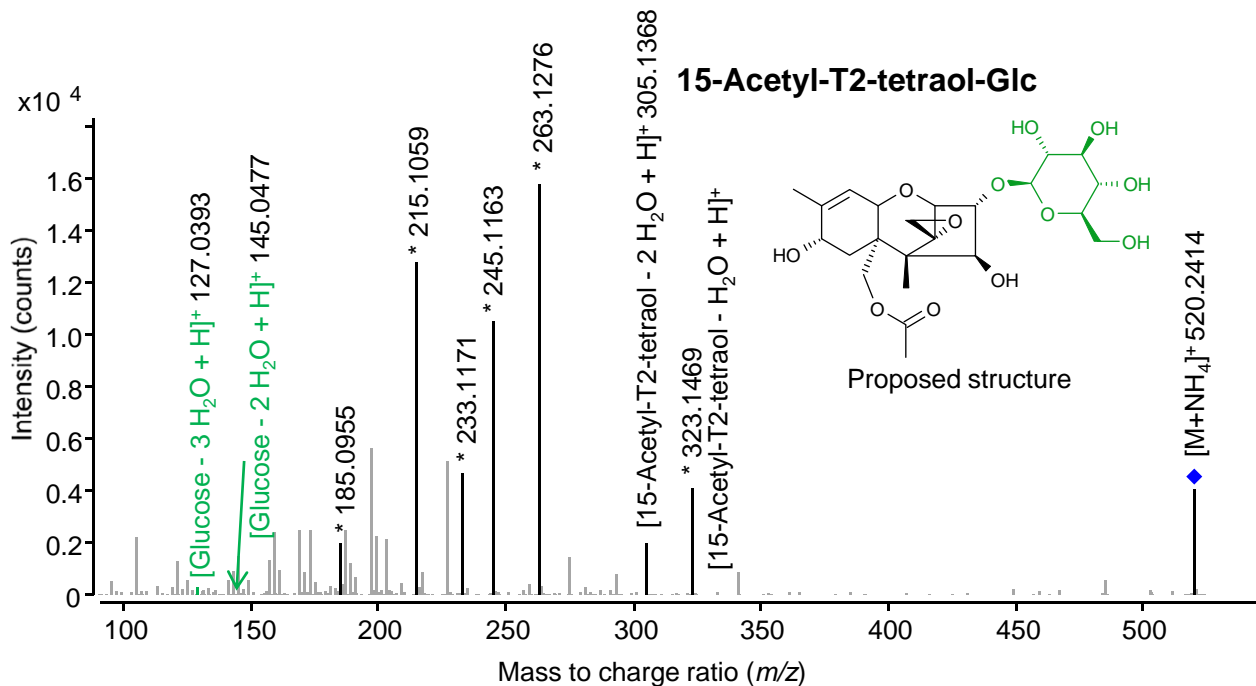

**Fig. S3** LC-HRMS/MS-spectrum of 15-acetyl-T2-tetraol-Glc, an *in planta* metabolite of HT-2 toxin and T-2 toxin. Analysis was performed with a 6550 iFunnel Q-TOF LC/MS system in positive electrospray ionisation mode with a collision energy of 10 V. The ammonium adduct was chosen as precursor (marked with a diamond). Characteristic fragments used for annotation are highlighted, those fragments originating from the conjugate glucose are displayed in green and characteristic HT-2 toxin fragments are marked with an asterisk (\*). T2 (T-2 toxin), Glc (glucoside)

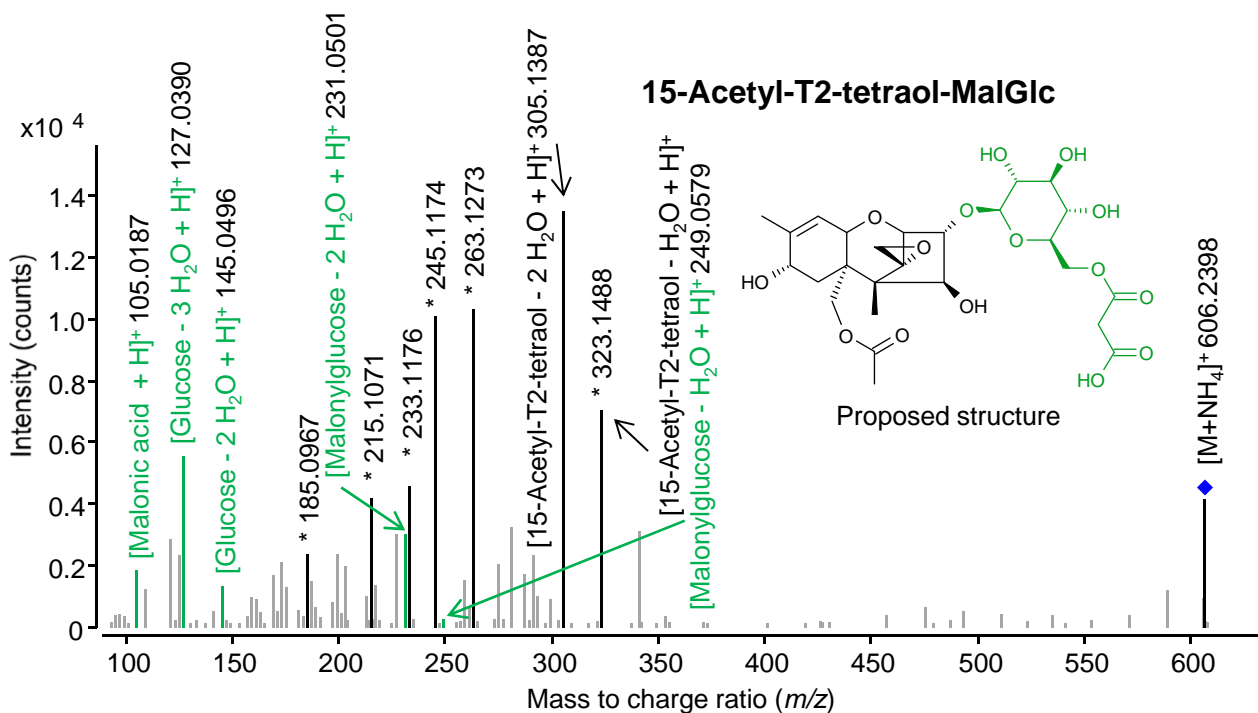

**Fig. S4** LC-HRMS/MS-spectrum of 15-acetyl-T2-tetraol-MalGlc, an *in planta* metabolite of HT-2 toxin and T-2 toxin. Analysis was performed with a 6550 iFunnel Q-TOF LC/MS system in positive electrospray ionisation mode with a collision energy of 16 V. The ammonium adduct was chosen as precursor (marked with a diamond). Characteristic fragments used for annotation are highlighted, those fragments originating from the conjugate malonylglucose are displayed in green and characteristic HT-2 toxin fragments are marked with an asterisk (\*). T2 (T-2 toxin), MalGlc (malonylglucoside)

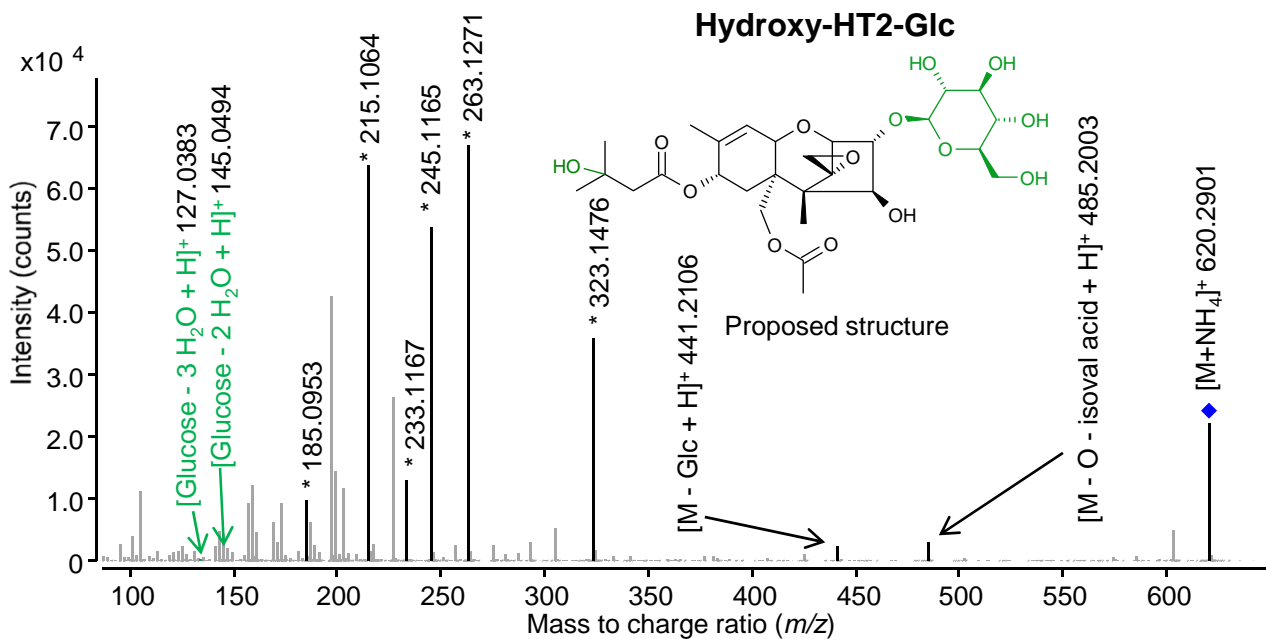

**Fig. S5** LC-HRMS/MS-spectrum of hydroxy-HT2-Glc, an *in planta* metabolite of HT-2 toxin and T-2 toxin. Analysis was performed with a 6550 iFunnel Q-TOF LC/MS system in positive electrospray ionisation mode with a collision energy of 10 V. The ammonium adduct was chosen as precursor (marked with a diamond). Characteristic fragments used for annotation are highlighted, those fragments originating from the conjugate glucose are displayed in green and characteristic HT-2 toxin fragments are marked with an asterisk (\*). HT2 (HT-2 toxin), Glc (glucoside), isoval acid (isovaleric acid)

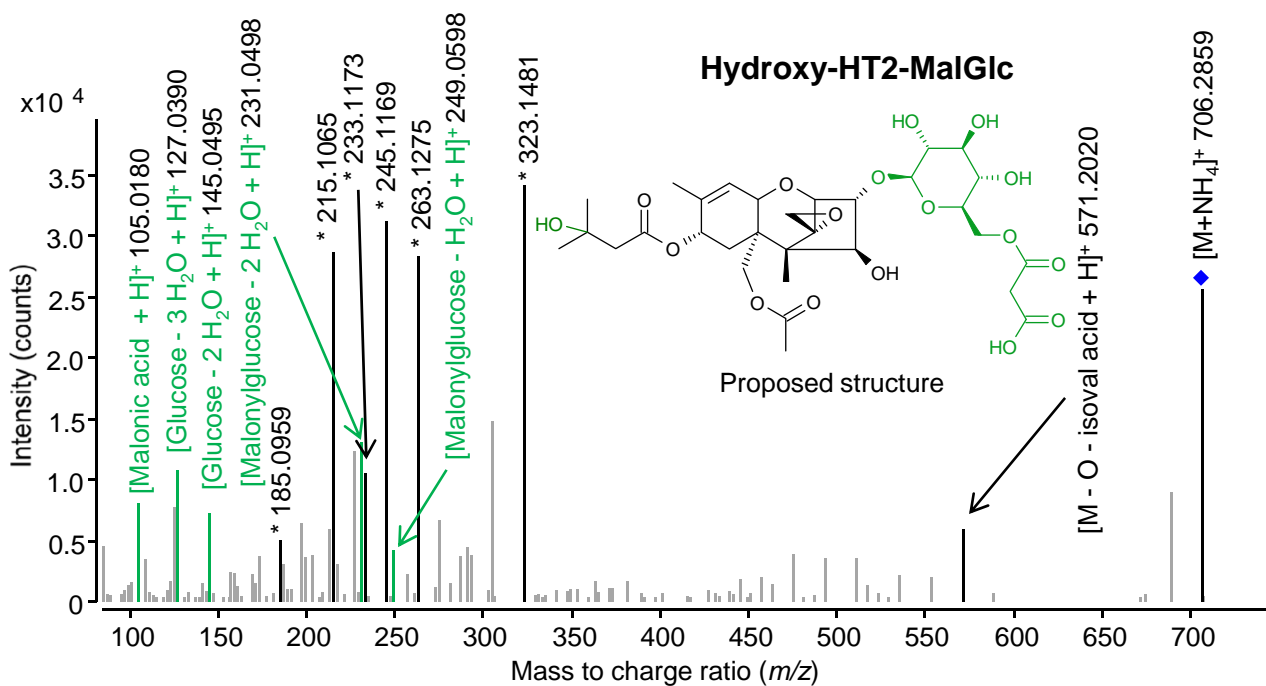

**Fig. S6** LC-HRMS/MS-spectrum of hydroxy-HT2-MalGlc, an *in planta* metabolite of HT-2 toxin and T-2 toxin. Analysis was performed with a 6550 iFunnel Q-TOF LC/MS system in positive electrospray ionisation mode with a collision energy of 16 V. The ammonium adduct was chosen as precursor (marked with a diamond). Characteristic fragments used for annotation are highlighted, those fragments originating from the conjugate malonylglucose are displayed in green and characteristic HT-2 toxin fragments are marked with an asterisk (\*). HT2 (HT-2 toxin), MalGlc (malonylglucoside), isoval acid (isovaleric acid)

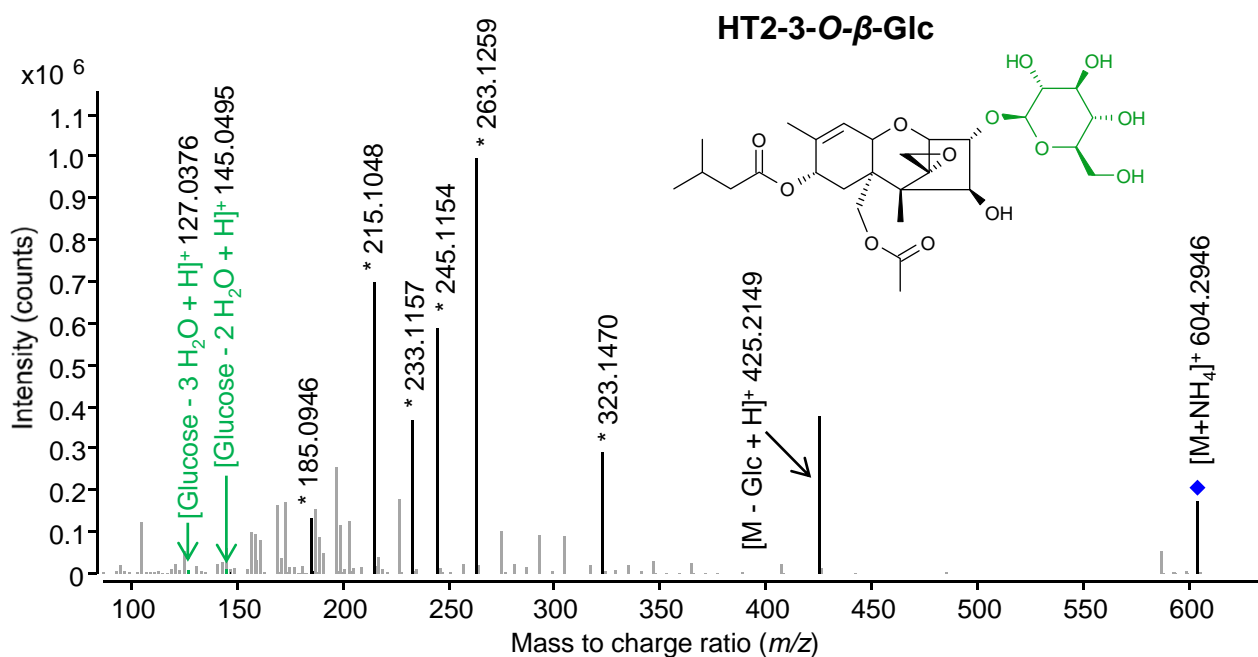

**Fig. S7** LC-HRMS/MS-spectrum of HT2-3-O- $\beta$ -Glc, an *in planta* metabolite of HT-2 toxin and T-2 toxin. Analysis was performed with a 6550 iFunnel Q-TOF LC/MS system in positive electrospray ionisation mode with a collision energy of 10 V. The ammonium adduct was chosen as precursor (marked with a diamond). Characteristic fragments used for annotation are highlighted, those fragments originating from the conjugate glucose are displayed in green and characteristic HT-2 toxin fragments are marked with an asterisk (\*). HT2 (HT-2 toxin), Glc (glucoside)

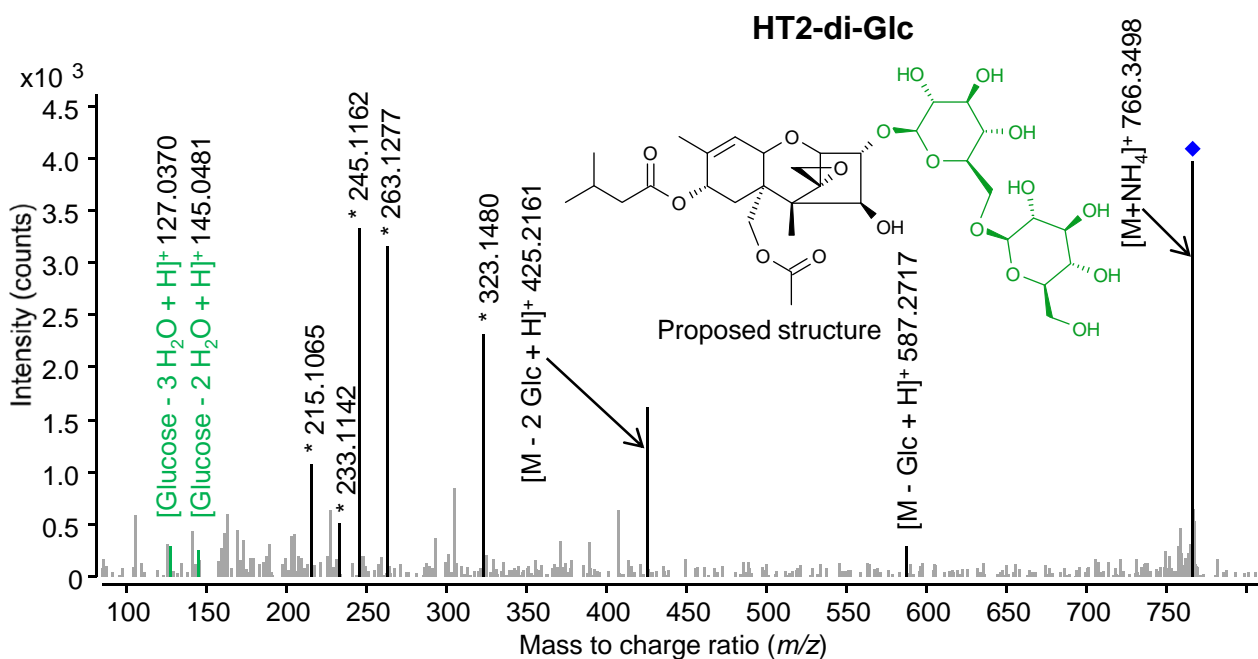

**Fig. S8** LC-HRMS/MS-spectrum of HT2-di-Glc, an *in planta* metabolite of HT-2 toxin and T-2 toxin. Analysis was performed with a 6550 iFunnel Q-TOF LC/MS system in positive electrospray ionisation mode with a collision energy of 10 V. The ammonium adduct was chosen as precursor (marked with a diamond). Characteristic fragments used for annotation are highlighted, those fragments originating from the conjugate glucose are displayed in green and characteristic HT-2 toxin fragments are marked with an asterisk (\*). HT2 (HT-2 toxin), Glc (glucoside)

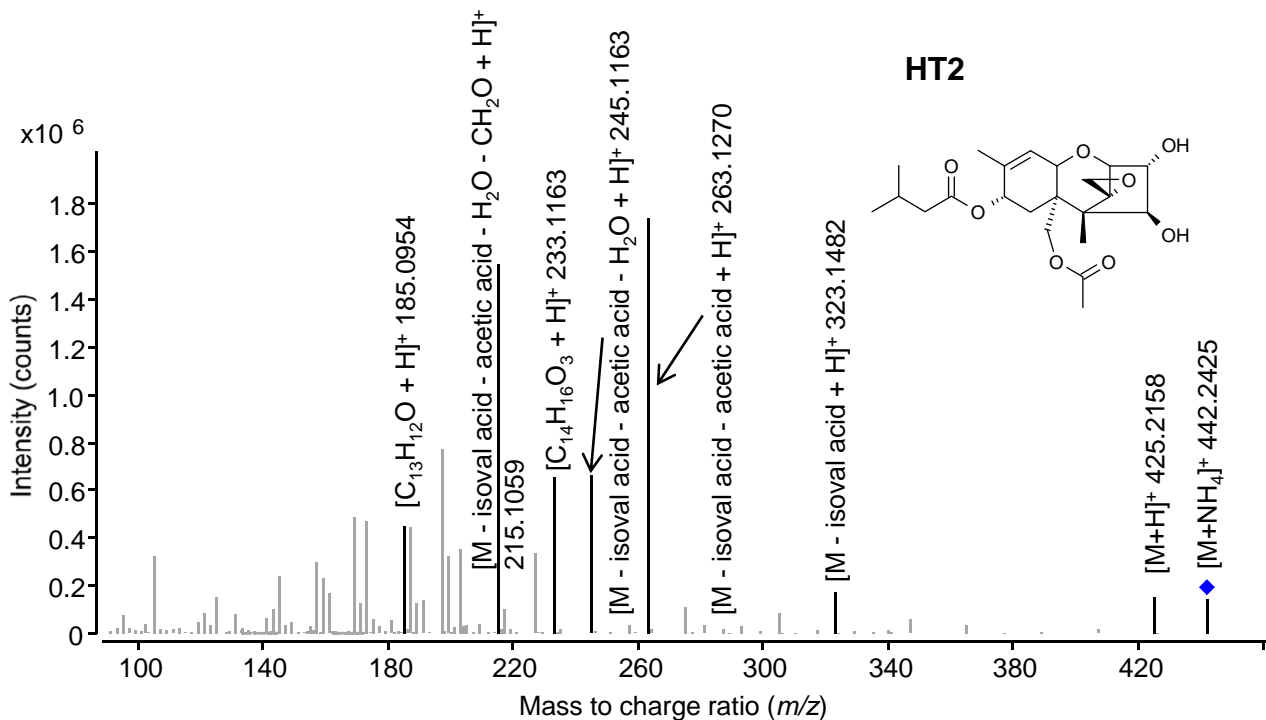

**Fig. S9** LC-HRMS/MS-spectrum of HT-2 toxin, an *in planta* metabolite of T-2 toxin. Analysis was performed with a 6550 iFunnel Q-TOF LC/MS system in positive electrospray ionisation mode with a collision energy of 10 V. The ammonium adduct was chosen as precursor (marked with a diamond). Characteristic fragments used for annotation are highlighted. HT2 (HT-2 toxin), isoval acid (isovaleric acid)

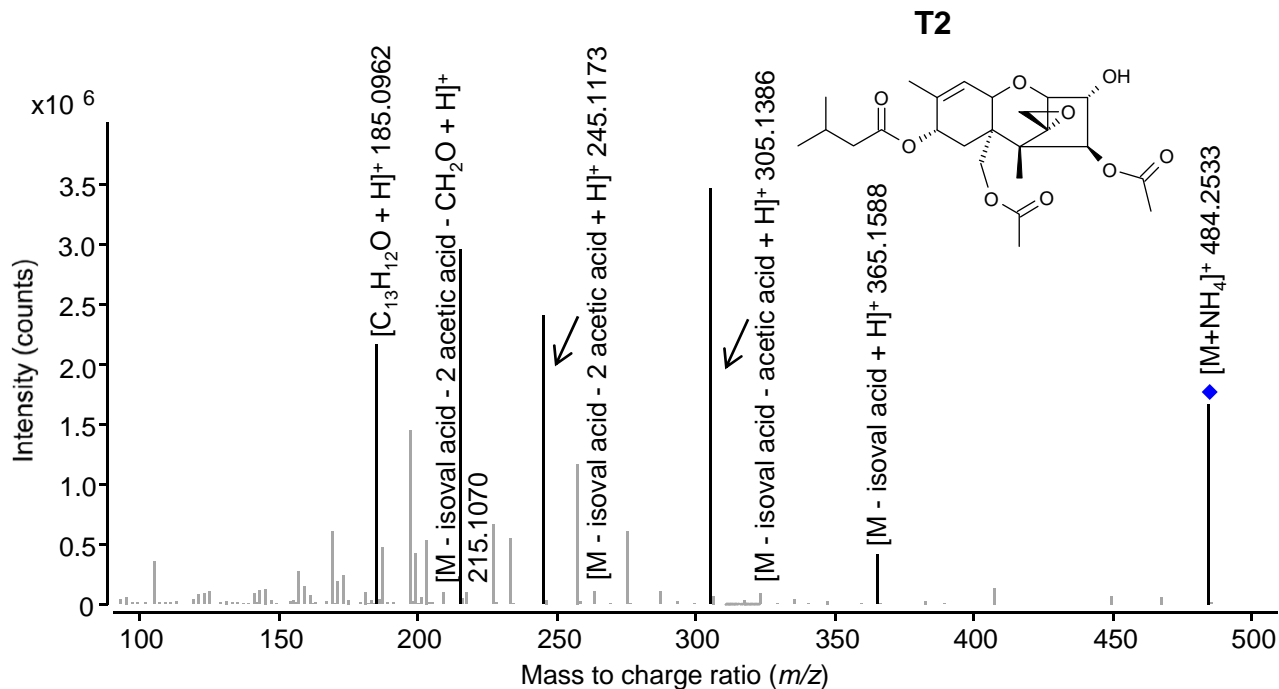

**Fig. S10** LC-HRMS/MS-spectrum of T-2 toxin. Analysis was performed with a 6550 iFunnel Q-TOF LC/MS system in positive electrospray ionisation mode with a collision energy of 10 V. The ammonium adduct was chosen as precursor (marked with a diamond). Characteristic fragments used for annotation are highlighted. T2 (T-2 toxin), isoval acid (isovaleric acid)

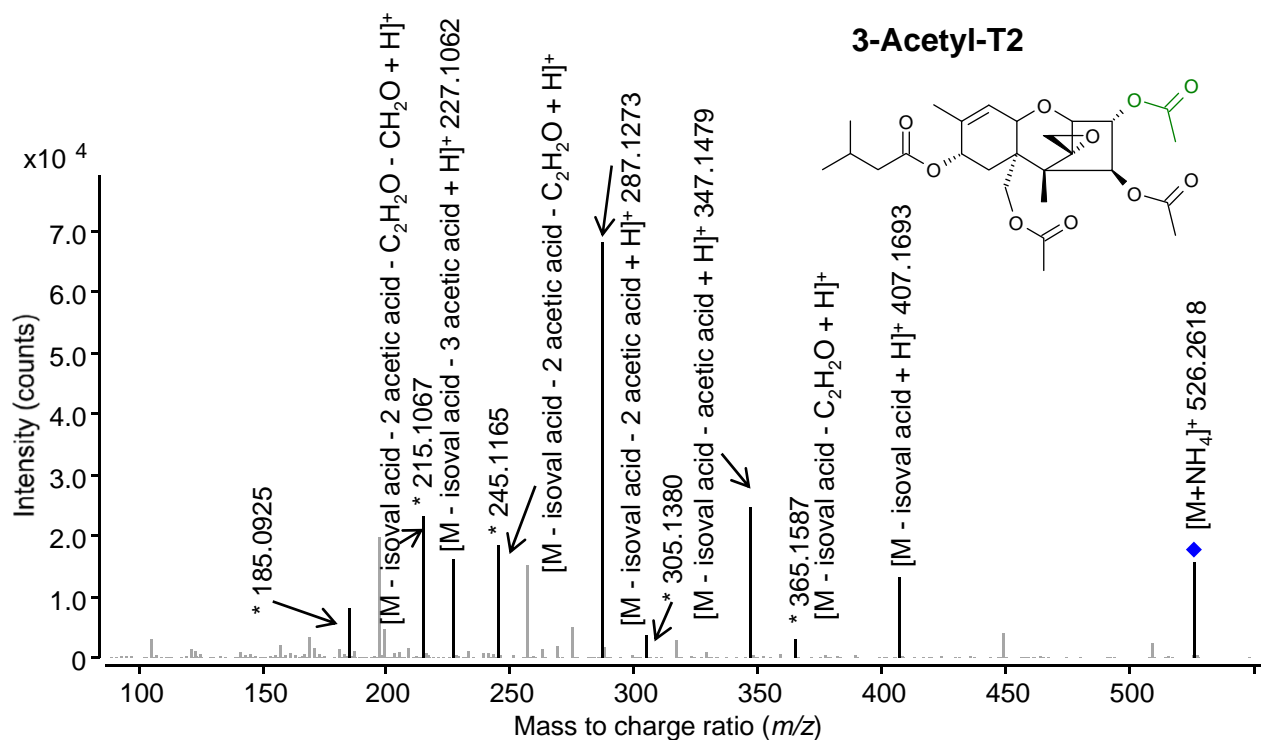

**Fig. S11** LC-HRMS/MS-spectrum of 3-acetyl-T2, an *in planta* metabolite of T-2 toxin. Analysis was performed with a 6550 iFunnel Q-TOF LC/MS system in positive electrospray ionisation mode with a collision energy of 10 V. The ammonium adduct was chosen as precursor (marked with a diamond). Characteristic fragments used for annotation are highlighted and characteristic T-2 toxin fragments are marked with an asterisk (\*). T2 (T-2 toxin), isoval acid (isovaleric acid)

**Table S12** Signal suppression or enhancement (%) of different dilutions of 1 day and ripen barley extraction solution determined for HT2, T2, HT2-3-*O*- $\beta$ -Glc, T2-Glc and 3-acetyl-T2.

| Analyte                        | Undiluted   |             | 1+9         |             | 1+49        |               |
|--------------------------------|-------------|-------------|-------------|-------------|-------------|---------------|
|                                | 1 day       | ripen       | 1 day       | ripen       | 1 day       | ripen         |
| HT2                            | 137 $\pm$ 4 | 144 $\pm$ 3 | 107 $\pm$ 2 | 114 $\pm$ 1 | 107 $\pm$ 1 | 108 $\pm$ 1   |
| T2                             | 116 $\pm$ 5 | 106 $\pm$ 3 | 102 $\pm$ 3 | 102 $\pm$ 1 | 104 $\pm$ 1 | 103 $\pm$ 1   |
| HT2-3- <i>O</i> - $\beta$ -Glc | 138 $\pm$ 3 | 142 $\pm$ 2 | 106 $\pm$ 1 | 112 $\pm$ 3 | 107 $\pm$ 1 | 106 $\pm$ 1   |
| T2-Glc                         | 131 $\pm$ 3 | 134 $\pm$ 1 | 105 $\pm$ 3 | 109 $\pm$ 1 | 104 $\pm$ 1 | 105 $\pm$ 0.3 |
| 3-Acetyl-T2                    | 89 $\pm$ 3  | 88 $\pm$ 3  | 98 $\pm$ 4  | 98 $\pm$ 1  | 104 $\pm$ 1 | 102 $\pm$ 1   |

HT2 (HT-2 toxin), T2 (T-2 toxin), Glc (glucoside). Mean value of spiked biological triplicate  $\pm$  relative standard deviation is stated.
